# Supplementary material for: E2F1 promotes Warburg effect and cancer progression via upregulating ENO2 expression in Ewing sarcoma
Source: PubMed Central journal article supplement — Mol Med Rep. 2022 May 27;26(1):237. doi: 10.3892/mmr.2022.12753 (PMC9185680; doi:10.3892/mmr.2022.12753), 2022-05-27
Supplement: Supplementary_Data.pdf [file Supplementary_Data.pdf]

Table SI. Glycolysis genes retrieved from KEGG (<https://www.kegg.jp/>).

| Glycolysis genes from KEGG |              |               |                |              |             |
|----------------------------|--------------|---------------|----------------|--------------|-------------|
| <i>ADH1A</i>               | <i>ALDOB</i> | <i>GAPDH</i>  | <i>LDHA</i>    | <i>PFKL</i>  | <i>PKLR</i> |
| <i>ADH1B</i>               | <i>ALDOC</i> | <i>GAPDHS</i> | <i>LDHAL6A</i> | <i>PFKM</i>  | <i>PKM</i>  |
| <i>ADH1C</i>               | <i>DLAT</i>  | <i>GCK</i>    | <i>LDHAL6B</i> | <i>PFKP</i>  | <i>TPI1</i> |
| <i>ADH4</i>                | <i>DLD</i>   | <i>GPI</i>    | <i>LDHB</i>    | <i>PGAM1</i> |             |
| <i>ADH5</i>                | <i>ENO1</i>  | <i>HK1</i>    | <i>LDHC</i>    | <i>PGAM2</i> |             |
| <i>ADH6</i>                | <i>ENO2</i>  | <i>HK2</i>    | <i>PDHA1</i>   | <i>PGAM4</i> |             |
| <i>ADH7</i>                | <i>ENO3</i>  | <i>HK3</i>    | <i>PDHA2</i>   | <i>PGK1</i>  |             |
| <i>ALDOA</i>               | <i>ENO4</i>  | <i>HKDC1</i>  | <i>PDHB</i>    | <i>PGK2</i>  |             |

KEGG, Kyoto Encyclopedia of Genes and Genomes.

Table SII. Human transcription factors retrieved from a public database (<http://humantfs.ccb.utoronto.ca/>).

| Human Transcription Factors |       |           |         |       |        |        |        |        |        |        |
|-----------------------------|-------|-----------|---------|-------|--------|--------|--------|--------|--------|--------|
| AC008770.3                  | DPF1  | GSC       | L3MBTL3 | NR1H3 | SALL2  | THAP11 | ZNF10  | ZNF391 | ZNF611 | ZNF841 |
| AC023509.3                  | DPF3  | GSC2      | L3MBTL4 | NR1H4 | SALL3  | THAP12 | ZNF100 | ZNF394 | ZNF613 | ZNF843 |
| AC092835.1                  | DPRX  | GSX1      | LBX1    | NR1I2 | SALL4  | THAP2  | ZNF101 | ZNF395 | ZNF614 | ZNF844 |
| AC138696.1                  | DR1   | GSX2      | LBX2    | NR1I3 | SATB1  | THAP3  | ZNF107 | ZNF396 | ZNF615 | ZNF845 |
| ADNP                        | DRAP1 | GTF2B     | LCOR    | NR2C1 | SATB2  | THAP4  | ZNF112 | ZNF397 | ZNF616 | ZNF846 |
| ADNP2                       | DRGX  | GTF2I     | LCORL   | NR2C2 | SCMH1  | THAP5  | ZNF114 | ZNF398 | ZNF618 | ZNF85  |
| AEBP1                       | DUX1  | GTF2IRD1  | LEF1    | NR2E1 | SCML4  | THAP6  | ZNF117 | ZNF404 | ZNF619 | ZNF850 |
| AEBP2                       | DUX3  | GTF2IRD2  | LEUTX   | NR2E3 | SCRT1  | THAP7  | ZNF12  | ZNF407 | ZNF620 | ZNF852 |
| AHCTF1                      | DUX4  | GTF2IRD2B | LHX1    | NR2F1 | SCRT2  | THAP8  | ZNF121 | ZNF408 | ZNF621 | ZNF853 |
| AHDC1                       | DUXA  | GTF3A     | LHX2    | NR2F2 | SCX    | THAP9  | ZNF124 | ZNF41  | ZNF623 | ZNF860 |
| AHR                         | DZIP1 | GZF1      | LHX3    | NR2F6 | SEBOX  | THRA   | ZNF131 | ZNF410 | ZNF624 | ZNF865 |
| AHRR                        | E2F1  | HAND1     | LHX4    | NR3C1 | SETBP1 | THRB   | ZNF132 | ZNF414 | ZNF625 | ZNF878 |
| AIRE                        | E2F2  | HAND2     | LHX5    | NR3C2 | SETDB1 | THYN1  | ZNF133 | ZNF415 | ZNF626 | ZNF879 |
| AKAP8                       | E2F3  | HBP1      | LHX6    | NR4A1 | SETDB2 | TIGD1  | ZNF134 | ZNF416 | ZNF627 | ZNF880 |
| AKAP8L                      | E2F4  | HDX       | LHX8    | NR4A2 | SGSM2  | TIGD2  | ZNF135 | ZNF417 | ZNF628 | ZNF883 |
| AKNA                        | E2F5  | HELT      | LHX9    | NR4A3 | SHOX   | TIGD3  | ZNF136 | ZNF418 | ZNF629 | ZNF888 |
| ALX1                        | E2F6  | HES1      | LIN28A  | NR5A1 | SHOX2  | TIGD4  | ZNF138 | ZNF419 | ZNF630 | ZNF891 |
| ALX3                        | E2F7  | HES2      | LIN28B  | NR5A2 | SIM1   | TIGD5  | ZNF14  | ZNF420 | ZNF639 | ZNF90  |
| ALX4                        | E2F8  | HES3      | LIN54   | NR6A1 | SIM2   | TIGD6  | ZNF140 | ZNF423 | ZNF641 | ZNF91  |
| ANHX                        | E4F1  | HES4      | LMX1A   | NRF1  | SIX1   | TIGD7  | ZNF141 | ZNF425 | ZNF644 | ZNF92  |
| ANKZF1                      | EBF1  | HES5      | LMX1B   | NRL   | SIX2   | TLX1   | ZNF142 | ZNF426 | ZNF645 | ZNF93  |
| AR                          | EBF2  | HES6      | LTF     | OLIG1 | SIX3   | TLX2   | ZNF143 | ZNF428 | ZNF646 | ZNF98  |
| ARGFX                       | EBF3  | HES7      | LYL1    | OLIG2 | SIX4   | TLX3   | ZNF146 | ZNF429 | ZNF648 | ZNF99  |
| ARHGAP35                    | EBF4  | HESX1     | MAF     | OLIG3 | SIX5   | TMF1   | ZNF148 | ZNF43  | ZNF649 | ZSCAN1 |

|        |       |        |       |         |          |         |        |        |        |         |
|--------|-------|--------|-------|---------|----------|---------|--------|--------|--------|---------|
| ARID2  | EEA1  | HEY1   | MAFA  | ONECUT1 | SIX6     | TOPORS  | ZNF154 | ZNF430 | ZNF652 | ZSCAN10 |
| ARID3A | EGR1  | HEY2   | MAFB  | ONECUT2 | SKI      | TP53    | ZNF155 | ZNF431 | ZNF653 | ZSCAN12 |
| ARID3B | EGR2  | HEYL   | MAFF  | ONECUT3 | SKIL     | TP63    | ZNF157 | ZNF432 | ZNF654 | ZSCAN16 |
| ARID3C | EGR3  | HHEX   | MAFG  | OSR1    | SKOR1    | TP73    | ZNF16  | ZNF433 | ZNF655 | ZSCAN18 |
| ARID5A | EGR4  | HIC1   | MAFK  | OSR2    | SKOR2    | TPRX1   | ZNF160 | ZNF436 | ZNF658 | ZSCAN2  |
| ARID5B | EHF   | HIC2   | MAX   | OTP     | SLC2A4RG | TRAFD1  | ZNF165 | ZNF438 | ZNF66  | ZSCAN20 |
| ARNT   | ELF1  | HIF1A  | MAZ   | OTX1    | SMAD1    | TRERF1  | ZNF169 | ZNF439 | ZNF660 | ZSCAN21 |
| ARNT2  | ELF2  | HIF3A  | MBD1  | OTX2    | SMAD3    | TRPS1   | ZNF17  | ZNF44  | ZNF662 | ZSCAN22 |
| ARNTL  | ELF3  | HINFP  | MBD2  | OVOL1   | SMAD4    | TSC22D1 | ZNF174 | ZNF440 | ZNF664 | ZSCAN23 |
| ARNTL2 | ELF4  | HIVEP1 | MBD3  | OVOL2   | SMAD5    | TSHZ1   | ZNF175 | ZNF441 | ZNF665 | ZSCAN25 |
| ARX    | ELF5  | HIVEP2 | MBD4  | OVOL3   | SMAD9    | TSHZ2   | ZNF177 | ZNF442 | ZNF667 | ZSCAN26 |
| ASCL1  | ELK1  | HIVEP3 | MBD6  | PA2G4   | SMYD3    | TSHZ3   | ZNF18  | ZNF443 | ZNF668 | ZSCAN29 |
| ASCL2  | ELK3  | HKR1   | MBNL2 | PATZ1   | SNAI1    | TTF1    | ZNF180 | ZNF444 | ZNF669 | ZSCAN30 |
| ASCL3  | ELK4  | HLF    | MECOM | PAX1    | SNAI2    | TWIST1  | ZNF181 | ZNF445 | ZNF670 | ZSCAN31 |
| ASCL4  | EMX1  | HLX    | MECP2 | PAX2    | SNAI3    | TWIST2  | ZNF182 | ZNF446 | ZNF671 | ZSCAN32 |
| ASCL5  | EMX2  | HMBOX1 | MEF2A | PAX3    | SNAPC2   | UBP1    | ZNF184 | ZNF449 | ZNF672 | ZSCAN4  |
| ASH1L  | EN1   | HMG20A | MEF2B | PAX4    | SNAPC4   | UNCX    | ZNF189 | ZNF45  | ZNF674 | ZSCAN5A |
| ATF1   | EN2   | HMG20B | MEF2C | PAX5    | SNAPC5   | USF1    | ZNF19  | ZNF451 | ZNF675 | ZSCAN5B |
| ATF2   | EOMES | HMGA1  | MEF2D | PAX6    | SOHLH1   | USF2    | ZNF195 | ZNF454 | ZNF676 | ZSCAN5C |
| ATF3   | EPAS1 | HMGA2  | MEIS1 | PAX7    | SOHLH2   | USF3    | ZNF197 | ZNF460 | ZNF677 | ZSCAN9  |
| ATF4   | ERF   | HMG3   | MEIS2 | PAX8    | SON      | VAX1    | ZNF2   | ZNF461 | ZNF678 | ZUFSP   |
| ATF5   | ERG   | HMX1   | MEIS3 | PAX9    | SOX1     | VAX2    | ZNF20  | ZNF462 | ZNF679 | ZXDA    |
| ATF6   | ESR1  | HMX2   | MEOX1 | PBX1    | SOX10    | VDR     | ZNF200 | ZNF467 | ZNF680 | ZXDB    |
| ATF6B  | ESR2  | HMX3   | MEOX2 | PBX2    | SOX11    | VENTX   | ZNF202 | ZNF468 | ZNF681 | ZXDC    |
| ATF7   | ESRRA | HNF1A  | MESP1 | PBX3    | SOX12    | VEZF1   | ZNF205 | ZNF469 | ZNF682 | ZZZ3    |
| ATMIN  | ESRRB | HNF1B  | MESP2 | PBX4    | SOX13    | VSX1    | ZNF207 | ZNF470 | ZNF683 |         |

|         |         |        |         |         |        |        |        |        |         |
|---------|---------|--------|---------|---------|--------|--------|--------|--------|---------|
| ATOH1   | ESRRG   | HNH4A  | MGA     | PCGF2   | SOX14  | VSX2   | ZNF208 | ZNF471 | ZNF684  |
| ATOH7   | ESX1    | HNH4G  | MITF    | PCGF6   | SOX15  | WIZ    | ZNF211 | ZNF473 | ZNF687  |
| ATOH8   | ETS1    | HOMEZ  | MIXL1   | PDX1    | SOX17  | WT1    | ZNF212 | ZNF474 | ZNF688  |
| BACH1   | ETS2    | HOXA1  | MKX     | PEG3    | SOX18  | XBP1   | ZNF213 | ZNF479 | ZNF689  |
| BACH2   | ETV1    | HOXA10 | MLX     | PGR     | SOX2   | XPA    | ZNF214 | ZNF48  | ZNF69   |
| BARHL1  | ETV2    | HOXA11 | MLXIP   | PHF1    | SOX21  | YBX1   | ZNF215 | ZNF480 | ZNF691  |
| BARHL2  | ETV3    | HOXA13 | MLXIPL  | PHF19   | SOX3   | YBX2   | ZNF217 | ZNF483 | ZNF692  |
| BARX1   | ETV3L   | HOXA2  | MNT     | PHF20   | SOX30  | YBX3   | ZNF219 | ZNF484 | ZNF695  |
| BARX2   | ETV4    | HOXA3  | MNX1    | PHF21A  | SOX4   | YY1    | ZNF22  | ZNF485 | ZNF696  |
| BATF    | ETV5    | HOXA4  | MSANTD1 | PHOX2A  | SOX5   | YY2    | ZNF221 | ZNF486 | ZNF697  |
| BATF2   | ETV6    | HOXA5  | MSANTD3 | PHOX2B  | SOX6   | ZBED1  | ZNF222 | ZNF487 | ZNF699  |
| BATF3   | ETV7    | HOXA6  | MSANTD4 | PIN1    | SOX7   | ZBED2  | ZNF223 | ZNF488 | ZNF7    |
| BAZ2A   | E VX1   | HOXA7  | MSC     | PITX1   | SOX8   | ZBED3  | ZNF224 | ZNF490 | ZNF70   |
| BAZ2B   | E VX2   | HOXA9  | MSGN1   | PITX2   | SOX9   | ZBED4  | ZNF225 | ZNF491 | ZNF700  |
| BBX     | FAM170A | HOXB1  | MSX1    | PITX3   | SP1    | ZBED5  | ZNF226 | ZNF492 | ZNF701  |
| BCL11A  | FAM200B | HOXB13 | MSX2    | PKNOX1  | SP100  | ZBED6  | ZNF227 | ZNF493 | ZNF703  |
| BCL11B  | FBXL19  | HOXB2  | MTERF1  | PKNOX2  | SP110  | ZBED9  | ZNF229 | ZNF496 | ZNF704  |
| BCL6    | FERD3L  | HOXB3  | MTERF2  | PLAG1   | SP140  | ZBTB1  | ZNF23  | ZNF497 | ZNF705A |
| BCL6B   | FEV     | HOXB4  | MTERF3  | PLAGL1  | SP140L | ZBTB10 | ZNF230 | ZNF500 | ZNF705B |
| BHLHA15 | FEZF1   | HOXB5  | MTERF4  | PLAGL2  | SP2    | ZBTB11 | ZNF232 | ZNF501 | ZNF705D |
| BHLHA9  | FEZF2   | HOXB6  | MTF1    | PLSCR1  | SP3    | ZBTB12 | ZNF233 | ZNF502 | ZNF705E |
| BHLHE22 | FIGLA   | HOXB7  | MTF2    | POGK    | SP4    | ZBTB14 | ZNF234 | ZNF503 | ZNF705G |
| BHLHE23 | FIZ1    | HOXB8  | MXD1    | POU1F1  | SP5    | ZBTB16 | ZNF235 | ZNF506 | ZNF706  |
| BHLHE40 | FLI1    | HOXB9  | MXD3    | POU2AF1 | SP6    | ZBTB17 | ZNF236 | ZNF507 | ZNF707  |
| BHLHE41 | FLYWCH1 | HOXC10 | MXD4    | POU2F1  | SP7    | ZBTB18 | ZNF239 | ZNF510 | ZNF708  |
| BNC1    | FOS     | HOXC11 | MXI1    | POU2F2  | SP8    | ZBTB2  | ZNF24  | ZNF511 | ZNF709  |

|                |         |        |         |         |        |        |         |         |        |
|----------------|---------|--------|---------|---------|--------|--------|---------|---------|--------|
| BNC2           | FOSB    | HOXC12 | MYB     | POU2F3  | SP9    | ZBTB20 | ZNF248  | ZNF512  | ZNF71  |
| BORCS8-MEF2B   | FOSL1   | HOXC13 | MYBL1   | POU3F1  | SPDEF  | ZBTB21 | ZNF25   | ZNF512B | ZNF710 |
| BPTF           | FOSL2   | HOXC4  | MYBL2   | POU3F2  | SPEN   | ZBTB22 | ZNF250  | ZNF513  | ZNF711 |
| BRF2           | FOXA1   | HOXC5  | MYC     | POU3F3  | SPI1   | ZBTB24 | ZNF251  | ZNF514  | ZNF713 |
| BSX            | FOXA2   | HOXC6  | MYCL    | POU3F4  | SPIB   | ZBTB25 | ZNF253  | ZNF516  | ZNF714 |
| C11orf95       | FOXA3   | HOXC8  | MYCN    | POU4F1  | SPIC   | ZBTB26 | ZNF254  | ZNF517  | ZNF716 |
| CAMTA1         | FOXB1   | HOXC9  | MYF5    | POU4F2  | SPZ1   | ZBTB3  | ZNF256  | ZNF518A | ZNF717 |
| CAMTA2         | FOXB2   | HOXD1  | MYF6    | POU4F3  | SRCAP  | ZBTB32 | ZNF257  | ZNF518B | ZNF718 |
| CARF           | FOXC1   | HOXD10 | MYNN    | POU5F1  | SREBF1 | ZBTB33 | ZNF26   | ZNF519  | ZNF721 |
| CASZ1          | FOXC2   | HOXD11 | MYOD1   | POU5F1B | SREBF2 | ZBTB34 | ZNF260  | ZNF521  | ZNF724 |
| CBX2           | FOXD1   | HOXD12 | MYOG    | POU5F2  | SRF    | ZBTB37 | ZNF263  | ZNF524  | ZNF726 |
| CC2D1A         | FOXD2   | HOXD13 | MYPOP   | POU6F1  | SRY    | ZBTB38 | ZNF264  | ZNF525  | ZNF727 |
| CCDC169-SOHLH2 | FOXD3   | HOXD3  | MYRF    | POU6F2  | ST18   | ZBTB39 | ZNF266  | ZNF526  | ZNF728 |
| CCDC17         | FOXD4   | HOXD4  | MYRFL   | PPARA   | STAT1  | ZBTB4  | ZNF267  | ZNF527  | ZNF729 |
| CDC5L          | FOXD4L1 | HOXD8  | MYSM1   | PPARD   | STAT2  | ZBTB40 | ZNF268  | ZNF528  | ZNF730 |
| CDX1           | FOXD4L3 | HOXD9  | MYT1    | PPARG   | STAT3  | ZBTB41 | ZNF273  | ZNF529  | ZNF732 |
| CDX2           | FOXD4L4 | HSF1   | MYT1L   | PRDM1   | STAT4  | ZBTB42 | ZNF274  | ZNF530  | ZNF735 |
| CDX4           | FOXD4L5 | HSF2   | MZF1    | PRDM10  | STAT5A | ZBTB43 | ZNF275  | ZNF532  | ZNF736 |
| CEBPA          | FOXD4L6 | HSF4   | NACC2   | PRDM12  | STAT5B | ZBTB44 | ZNF276  | ZNF534  | ZNF737 |
| CEBPB          | FOXE1   | HSF5   | NAIF1   | PRDM13  | STAT6  | ZBTB45 | ZNF277  | ZNF536  | ZNF74  |
| CEBPD          | FOXE3   | HSFX1  | NANOG   | PRDM14  | T      | ZBTB46 | ZNF28   | ZNF540  | ZNF740 |
| CEBPE          | FOXF1   | HSFX2  | NANOGNB | PRDM15  | TAL1   | ZBTB47 | ZNF280A | ZNF541  | ZNF746 |
| CEBPG          | FOXF2   | HSFY1  | NANOGP8 | PRDM16  | TAL2   | ZBTB48 | ZNF280B | ZNF543  | ZNF747 |
| CEBPZ          | FOXG1   | HSFY2  | NCOA1   | PRDM2   | TBP    | ZBTB49 | ZNF280C | ZNF544  | ZNF749 |
| CENPA          | FOXH1   | IKZF1  | NCOA2   | PRDM4   | TBPL1  | ZBTB5  | ZNF280D | ZNF546  | ZNF750 |
| CENPB          | FOXI1   | IKZF2  | NCOA3   | PRDM5   | TBPL2  | ZBTB6  | ZNF281  | ZNF547  | ZNF75A |

|         |       |       |         |       |        |        |         |        |         |
|---------|-------|-------|---------|-------|--------|--------|---------|--------|---------|
| CENPBD1 | FOXI2 | IKZF3 | NEUROD1 | PRDM6 | TBR1   | ZBTB7A | ZNF282  | ZNF548 | ZNF75D  |
| CENPS   | FOXI3 | IKZF4 | NEUROD2 | PRDM8 | TBX1   | ZBTB7B | ZNF283  | ZNF549 | ZNF76   |
| CENPT   | FOXJ1 | IKZF5 | NEUROD4 | PRDM9 | TBX10  | ZBTB7C | ZNF284  | ZNF550 | ZNF761  |
| CENPX   | FOXJ2 | INSM1 | NEUROD6 | PREB  | TBX15  | ZBTB8A | ZNF285  | ZNF551 | ZNF763  |
| CGGBP1  | FOXJ3 | INSM2 | NEUROG1 | PRMT3 | TBX18  | ZBTB8B | ZNF286A | ZNF552 | ZNF764  |
| CHAMP1  | FOXK1 | IRF1  | NEUROG2 | PROP1 | TBX19  | ZBTB9  | ZNF286B | ZNF554 | ZNF765  |
| CHCHD3  | FOXK2 | IRF2  | NEUROG3 | PROX1 | TBX2   | ZC3H8  | ZNF287  | ZNF555 | ZNF766  |
| CIC     | FOXL1 | IRF3  | NFAT5   | PROX2 | TBX20  | ZEB1   | ZNF292  | ZNF556 | ZNF768  |
| CLOCK   | FOXL2 | IRF4  | NFATC1  | PRR12 | TBX21  | ZEB2   | ZNF296  | ZNF557 | ZNF77   |
| CPEB1   | FOXM1 | IRF5  | NFATC2  | PRRX1 | TBX22  | ZFAT   | ZNF3    | ZNF558 | ZNF770  |
| CPXCR1  | FOXN1 | IRF6  | NFATC3  | PRRX2 | TBX3   | ZFHX2  | ZNF30   | ZNF559 | ZNF771  |
| CREB1   | FOXN2 | IRF7  | NFATC4  | PTF1A | TBX4   | ZFHX3  | ZNF300  | ZNF560 | ZNF772  |
| CREB3   | FOXN3 | IRF8  | NFE2    | PURA  | TBX5   | ZFHX4  | ZNF302  | ZNF561 | ZNF773  |
| CREB3L1 | FOXN4 | IRF9  | NFE2L1  | PURB  | TBX6   | ZFP1   | ZNF304  | ZNF562 | ZNF774  |
| CREB3L2 | FOXO1 | IRX1  | NFE2L2  | PURG  | TCF12  | ZFP14  | ZNF311  | ZNF563 | ZNF775  |
| CREB3L3 | FOXO3 | IRX2  | NFE2L3  | RAG1  | TCF15  | ZFP2   | ZNF316  | ZNF564 | ZNF776  |
| CREB3L4 | FOXO4 | IRX3  | NFE4    | RARA  | TCF20  | ZFP28  | ZNF317  | ZNF565 | ZNF777  |
| CREB5   | FOXO6 | IRX4  | NFIA    | RARB  | TCF21  | ZFP3   | ZNF318  | ZNF566 | ZNF778  |
| CREBL2  | FOXP1 | IRX5  | NFIB    | RARG  | TCF23  | ZFP30  | ZNF319  | ZNF567 | ZNF780A |
| CREBZF  | FOXP2 | IRX6  | NFIC    | RAX   | TCF24  | ZFP37  | ZNF32   | ZNF568 | ZNF780B |
| CREM    | FOXP3 | ISL1  | NFIL3   | RAX2  | TCF3   | ZFP41  | ZNF320  | ZNF569 | ZNF781  |
| CRX     | FOXP4 | ISL2  | NFIX    | RBAK  | TCF4   | ZFP42  | ZNF322  | ZNF57  | ZNF782  |
| CSRNP1  | FOXQ1 | ISX   | NFKB1   | RBCK1 | TCF7   | ZFP57  | ZNF324  | ZNF570 | ZNF783  |
| CSRNP2  | FOXR1 | JAZF1 | NFKB2   | RBPJ  | TCF7L1 | ZFP62  | ZNF324B | ZNF571 | ZNF784  |
| CSRNP3  | FOXR2 | JDP2  | NFX1    | RBPJL | TCF7L2 | ZFP64  | ZNF326  | ZNF572 | ZNF785  |
| CTCF    | FOXS1 | JRK   | NFXL1   | RBSN  | TCFL5  | ZFP69  | ZNF329  | ZNF573 | ZNF786  |

|        |         |        |        |         |         |         |         |         |         |
|--------|---------|--------|--------|---------|---------|---------|---------|---------|---------|
| CTCFL  | GABPA   | JRKL   | NFYA   | REL     | TEAD1   | ZFP69B  | ZNF331  | ZNF574  | ZNF787  |
| CUX1   | GATA1   | JUN    | NFYB   | RELA    | TEAD2   | ZFP82   | ZNF333  | ZNF575  | ZNF788  |
| CUX2   | GATA2   | JUNB   | NFYC   | RELB    | TEAD3   | ZFP90   | ZNF334  | ZNF576  | ZNF789  |
| CXXC1  | GATA3   | JUND   | NHLH1  | REPIN1  | TEAD4   | ZFP91   | ZNF335  | ZNF577  | ZNF79   |
| CXXC4  | GATA4   | KAT7   | NHLH2  | REST    | TEF     | ZFP92   | ZNF337  | ZNF578  | ZNF790  |
| CXXC5  | GATA5   | KCMF1  | NKRF   | REXO4   | TERB1   | ZFPM1   | ZNF33A  | ZNF579  | ZNF791  |
| DACH1  | GATA6   | KCNIP3 | NKX1-1 | RFX1    | TERF1   | ZFPM2   | ZNF33B  | ZNF580  | ZNF792  |
| DACH2  | GATAD2A | KDM2A  | NKX1-2 | RFX2    | TERF2   | ZFX     | ZNF34   | ZNF581  | ZNF793  |
| DBP    | GATAD2B | KDM2B  | NKX2-1 | RFX3    | TET1    | ZFY     | ZNF341  | ZNF582  | ZNF799  |
| DBX1   | GBX1    | KDM5B  | NKX2-2 | RFX4    | TET2    | ZGLP1   | ZNF343  | ZNF583  | ZNF8    |
| DBX2   | GBX2    | KIN    | NKX2-3 | RFX5    | TET3    | ZGPAT   | ZNF345  | ZNF584  | ZNF80   |
| DDIT3  | GCM1    | KLF1   | NKX2-4 | RFX6    | TFAP2A  | ZHX1    | ZNF346  | ZNF585A | ZNF800  |
| DEAF1  | GCM2    | KLF10  | NKX2-5 | RFX7    | TFAP2B  | ZHX2    | ZNF347  | ZNF585B | ZNF804A |
| DLX1   | GFI1    | KLF11  | NKX2-6 | RFX8    | TFAP2C  | ZHX3    | ZNF35   | ZNF586  | ZNF804B |
| DLX2   | GFI1B   | KLF12  | NKX2-8 | RHOXF1  | TFAP2D  | ZIC1    | ZNF350  | ZNF587  | ZNF805  |
| DLX3   | GLI1    | KLF13  | NKX3-1 | RHOXF2  | TFAP2E  | ZIC2    | ZNF354A | ZNF587B | ZNF808  |
| DLX4   | GLI2    | KLF14  | NKX3-2 | RHOXF2B | TFAP4   | ZIC3    | ZNF354B | ZNF589  | ZNF81   |
| DLX5   | GLI3    | KLF15  | NKX6-1 | RLF     | TFCP2   | ZIC4    | ZNF354C | ZNF592  | ZNF813  |
| DLX6   | GLI4    | KLF16  | NKX6-2 | RORA    | TFCP2L1 | ZIC5    | ZNF358  | ZNF594  | ZNF814  |
| DMBX1  | GLIS1   | KLF17  | NKX6-3 | RORB    | TFDP1   | ZIK1    | ZNF362  | ZNF595  | ZNF816  |
| DMRT1  | GLIS2   | KLF2   | NME2   | RORC    | TFDP2   | ZIM2    | ZNF365  | ZNF596  | ZNF821  |
| DMRT2  | GLIS3   | KLF3   | NOBOX  | RREB1   | TFDP3   | ZIM3    | ZNF366  | ZNF597  | ZNF823  |
| DMRT3  | GLMP    | KLF4   | NOTO   | RUNX1   | TFE3    | ZKSCAN1 | ZNF367  | ZNF598  | ZNF827  |
| DMRTA1 | GLYR1   | KLF5   | NPAS1  | RUNX2   | TFEB    | ZKSCAN2 | ZNF37A  | ZNF599  | ZNF829  |
| DMRTA2 | GMEB1   | KLF6   | NPAS2  | RUNX3   | TFEC    | ZKSCAN3 | ZNF382  | ZNF600  | ZNF83   |
| DMRTB1 | GMEB2   | KLF7   | NPAS3  | RXRA    | TGIF1   | ZKSCAN4 | ZNF383  | ZNF605  | ZNF830  |

|         |         |         |       |       |         |         |         |        |        |
|---------|---------|---------|-------|-------|---------|---------|---------|--------|--------|
| DMRTC2  | GPBP1   | KLF8    | NPAS4 | RXRB  | TGIF2   | ZKSCAN5 | ZNF384  | ZNF606 | ZNF831 |
| DMTF1   | GPBP1L1 | KLF9    | NR0B1 | RXRG  | TGIF2LX | ZKSCAN7 | ZNF385A | ZNF607 | ZNF835 |
| DNMT1   | GRHL1   | KMT2A   | NR1D1 | SAFB  | TGIF2LY | ZKSCAN8 | ZNF385B | ZNF608 | ZNF836 |
| DNTTIP1 | GRHL2   | KMT2B   | NR1D2 | SAFB2 | THAP1   | ZMAT1   | ZNF385C | ZNF609 | ZNF837 |
| DOT1L   | GRHL3   | L3MBTL1 | NR1H2 | SALL1 | THAP10  | ZMAT4   | ZNF385D | ZNF610 | ZNF84  |

---



Table SIII. Glycolytic genes and transcription factors differentially expressed in EWS (GSE17679).

| Differentially expressed glycolytic genes |             |         |                    | Differentially expressed transcription factors |             |         |         |         |        |
|-------------------------------------------|-------------|---------|--------------------|------------------------------------------------|-------------|---------|---------|---------|--------|
| Mortality                                 | Progression | Overlap | Analyzed by ChIP-X | Mortality                                      | Progression | Overlap |         |         |        |
| ENO2                                      | ENO1        | ENO2    | AR                 | ADNP2                                          | MYBL2       | ZNF34   | AHCTF1  | TBX18   | ALX3   |
| GAPDH                                     | ENO2        | PFKM    | CTNNB1             | ALX3                                           | NEUROG3     | ZNF350  | ALX3    | TEAD4   | CBX2   |
| PFKM                                      | HK2         | TPI1    | CUX1               | ARID5B                                         | NFE2L2      | ZNF362  | ATOH8   | TEF     | CHCHD3 |
| TPI1                                      | PFKM        |         | DNAJC2             | ARNT                                           | NFIX        | ZNF366  | BCL6    | TFAP2C  | DNMT1  |
|                                           | PFKP        |         | E2F1               | ASCL2                                          | NPAS3       | ZNF391  | CBX2    | TFCP2   | DOT1L  |
|                                           | PGAM1       |         | E2F4               | ATF5                                           | NR1H3       | ZNF417  | CEBPB   | TFDP1   | E2F1   |
|                                           | PKM         |         | EGR1               | BATF3                                          | NR1H2       | ZNF45   | CHAMP1  | TGIF2   | E2F3   |
|                                           | TPI1        |         | ELF1               | BAZ2B                                          | NR3C1       | ZNF451  | CHCHD3  | THAP5   | E2F6   |
|                                           |             |         | EWS-ERG            | BNC1                                           | OTX2        | ZNF467  | CTCF    | THYN1   | E2F7   |
|                                           |             |         | FLI1               | CARF                                           | PA2G4       | ZNF493  | DNMT1   | USF3    | FOXM1  |
|                                           |             |         | FOXP3              | CBX2                                           | PBX1        | ZNF506  | DOT1L   | VAX2    | FOXO6  |
|                                           |             |         | IKZF1              | CC2D1A                                         | PBX2        | ZNF511  | E2F1    | YBX3    | HES6   |
|                                           |             |         | MITF               | CEBPG                                          | PLAG1       | ZNF514  | E2F2    | YY1     | HMGA1  |
|                                           |             |         | MYC                | CENPB                                          | PLAGL2      | ZNF518B | E2F3    | ZBED3   | MAZ    |
|                                           |             |         | PHF8               | CHCHD3                                         | POU2F1      | ZNF528  | E2F6    | ZBTB20  | MYBL2  |
|                                           |             |         |                    | CREB3                                          | POU4F2      | ZNF540  | E2F7    | ZBTB21  | NR1H3  |
|                                           |             |         |                    | CREB5                                          | RLF         | ZNF546  | EBF3    | ZBTB24  | PA2G4  |
|                                           |             |         |                    | CUX1                                           | RORA        | ZNF555  | EGR3    | ZBTB44  | POU2F1 |
|                                           |             |         |                    | CUX2                                           | RREB1       | ZNF557  | EHF     | ZBTB7B  | SALL4  |
|                                           |             |         |                    | DEAF1                                          | RUNX3       | ZNF563  | ESX1    | ZFP90   | SRF    |
|                                           |             |         |                    | DNMT1                                          | SALL4       | ZNF568  | FLYWCH1 | ZKSCAN2 | USF3   |
|                                           |             |         |                    | DNTTIP1                                        | SCMH1       | ZNF573  | FOXD1   | ZNF180  | ZBED3  |
|                                           |             |         |                    | DOT1L                                          | SETDB2      | ZNF575  | FOKK2   | ZNF195  | ZBTB20 |
|                                           |             |         |                    | DPF1                                           | SMYD3       | ZNF579  | FOXM1   | ZNF207  | ZBTB24 |
|                                           |             |         |                    | E2F1                                           | SNAI2       | ZNF585B | FOXO6   | ZNF211  | ZNF219 |
|                                           |             |         |                    | E2F3                                           | SOX15       | ZNF594  | GMEB1   | ZNF219  | ZNF362 |

|         |         |         |        |         |         |
|---------|---------|---------|--------|---------|---------|
| E2F6    | SOX2    | ZNF597  | HES2   | ZNF223  | ZNF45   |
| E2F7    | SP100   | ZNF599  | HES6   | ZNF225  | ZNF467  |
| EEA1    | SP4     | ZNF621  | HMGA1  | ZNF23   | ZNF511  |
| EGR2    | SREBF1  | ZNF649  | HOXA1  | ZNF281  | ZNF546  |
| EGR4    | SRF     | ZNF658  | HOXA13 | ZNF287  | ZNF563  |
| ELF1    | STAT5B  | ZNF664  | HOXB13 | ZNF354A | ZNF594  |
| ELF2    | TBPL1   | ZNF669  | HOXC8  | ZNF362  | ZNF781  |
| ELF4    | TERF2   | ZNF671  | HOXD4  | ZNF367  | ZSCAN31 |
| ESRRB   | TET2    | ZNF688  | JDP2   | ZNF385B |         |
| ETV5    | TFDP2   | ZNF703  | LEF1   | ZNF396  |         |
| FOSL1   | THAP6   | ZNF710  | LYL1   | ZNF423  |         |
| FOXM1   | TIGD7   | ZNF717  | MAF    | ZNF436  |         |
| FOXO6   | USF3    | ZNF749  | MAZ    | ZNF45   |         |
| FOXP4   | YBX1    | ZNF763  | MBD6   | ZNF467  |         |
| GATA3   | ZBED3   | ZNF776  | MEIS1  | ZNF511  |         |
| GATA6   | ZBTB1   | ZNF781  | MLXIPL | ZNF512B |         |
| GMEB2   | ZBTB18  | ZNF83   | MYBL2  | ZNF541  |         |
| GPBP1L1 | ZBTB20  | ZNF844  | MYF5   | ZNF546  |         |
| GRHL2   | ZBTB24  | ZNF846  | MYRF   | ZNF563  |         |
| GTF3A   | ZBTB38  | ZNF92   | NKX2-1 | ZNF564  |         |
| HES6    | ZFP64   | ZNF93   | NOBOX  | ZNF583  |         |
| HIVEP3  | ZFP69   | ZSCAN31 | NR1D2  | ZNF592  |         |
| HMGA1   | ZHX1    |         | NR1H3  | ZNF594  |         |
| HMX2    | ZIC2    |         | OLIG2  | ZNF598  |         |
| HOXA4   | ZKSCAN5 |         | PA2G4  | ZNF600  |         |
| HSF5    | ZKSCAN7 |         | PAX3   | ZNF610  |         |
| ISL1    | ZNF112  |         | PAX6   | ZNF618  |         |
| ISL2    | ZNF124  |         | PCGF2  | ZNF625  |         |
| KAT7    | ZNF219  |         | POU2F1 | ZNF630  |         |

|         |         |        |         |
|---------|---------|--------|---------|
| KLF1    | ZNF26   | PPARG  | ZNF639  |
| KLF6    | ZNF264  | PRRX1  | ZNF668  |
| KLF8    | ZNF280B | SALL4  | ZNF708  |
| LIN28B  | ZNF280D | SHOX2  | ZNF74   |
| MAZ     | ZNF3    | SNAPC2 | ZNF75D  |
| MBNL2   | ZNF30   | SNAPC5 | ZNF764  |
| MEF2D   | ZNF302  | SOX1   | ZNF770  |
| MEIS2   | ZNF326  | SREBF2 | ZNF780B |
| MEIS3   | ZNF334  | SRF    | ZNF781  |
| MSANTD3 | ZNF34   | TBP    | ZSCAN31 |

---
